# Supplementary material
Source: ML conference proceedings conference paper supplement (https://aclanthology.org/2026.bionlp-2.25)
Supplement: SupplementaryMaterial [file pairwise.pdf › pairwise.pdf]

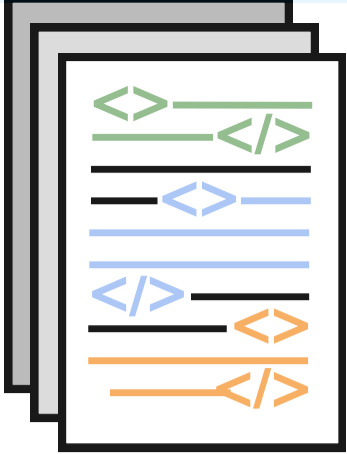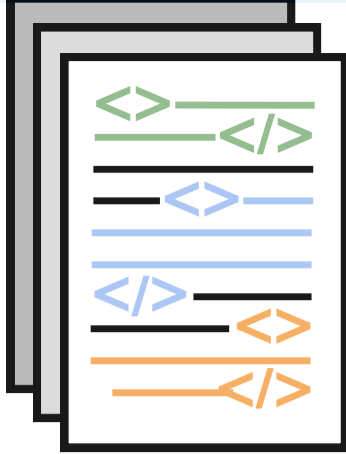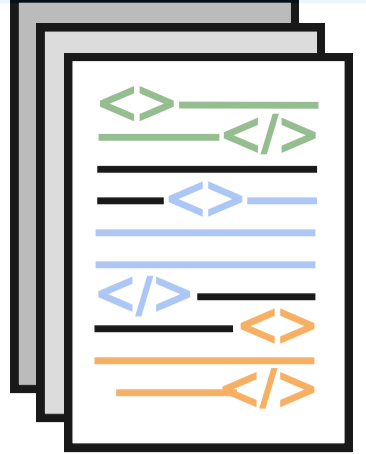

Qwen3.5-4B DFT

Qwen3.5-4B DFT  
GRPO

Qwen3.5-4B DFT  
Pseudo-labels

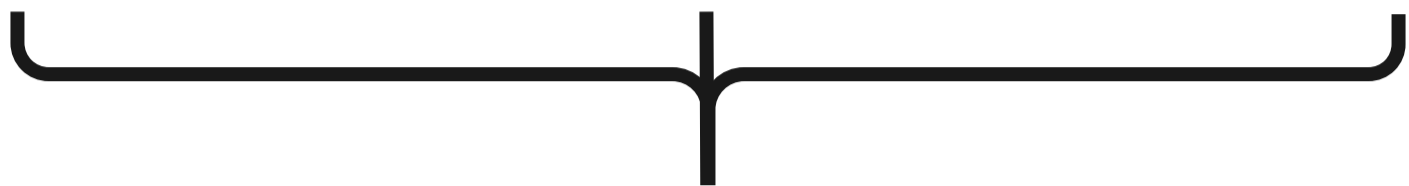

Analysis Per Document and Category

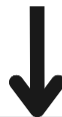

### Pairwise Agreement Score

Span F1 agreement → Normalize to sum to 1.0

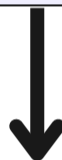

### Cluster Overlapping Spans

Pooling spans from all models then clustering

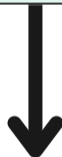

### Refine Cluster Boundary

Weighted boundary vote

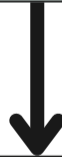

### Deduplication & Sorting

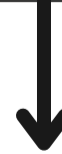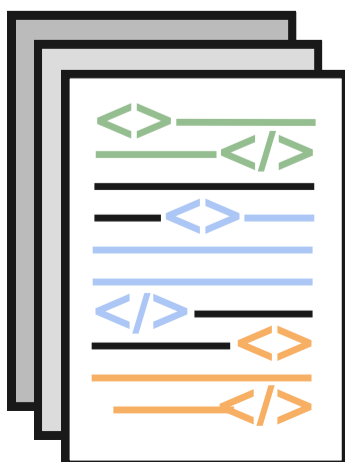

Final Predictions
