# Supplementary material
Source: ML conference proceedings conference paper supplement (https://aclanthology.org/2026.bionlp-2.25)

## Training

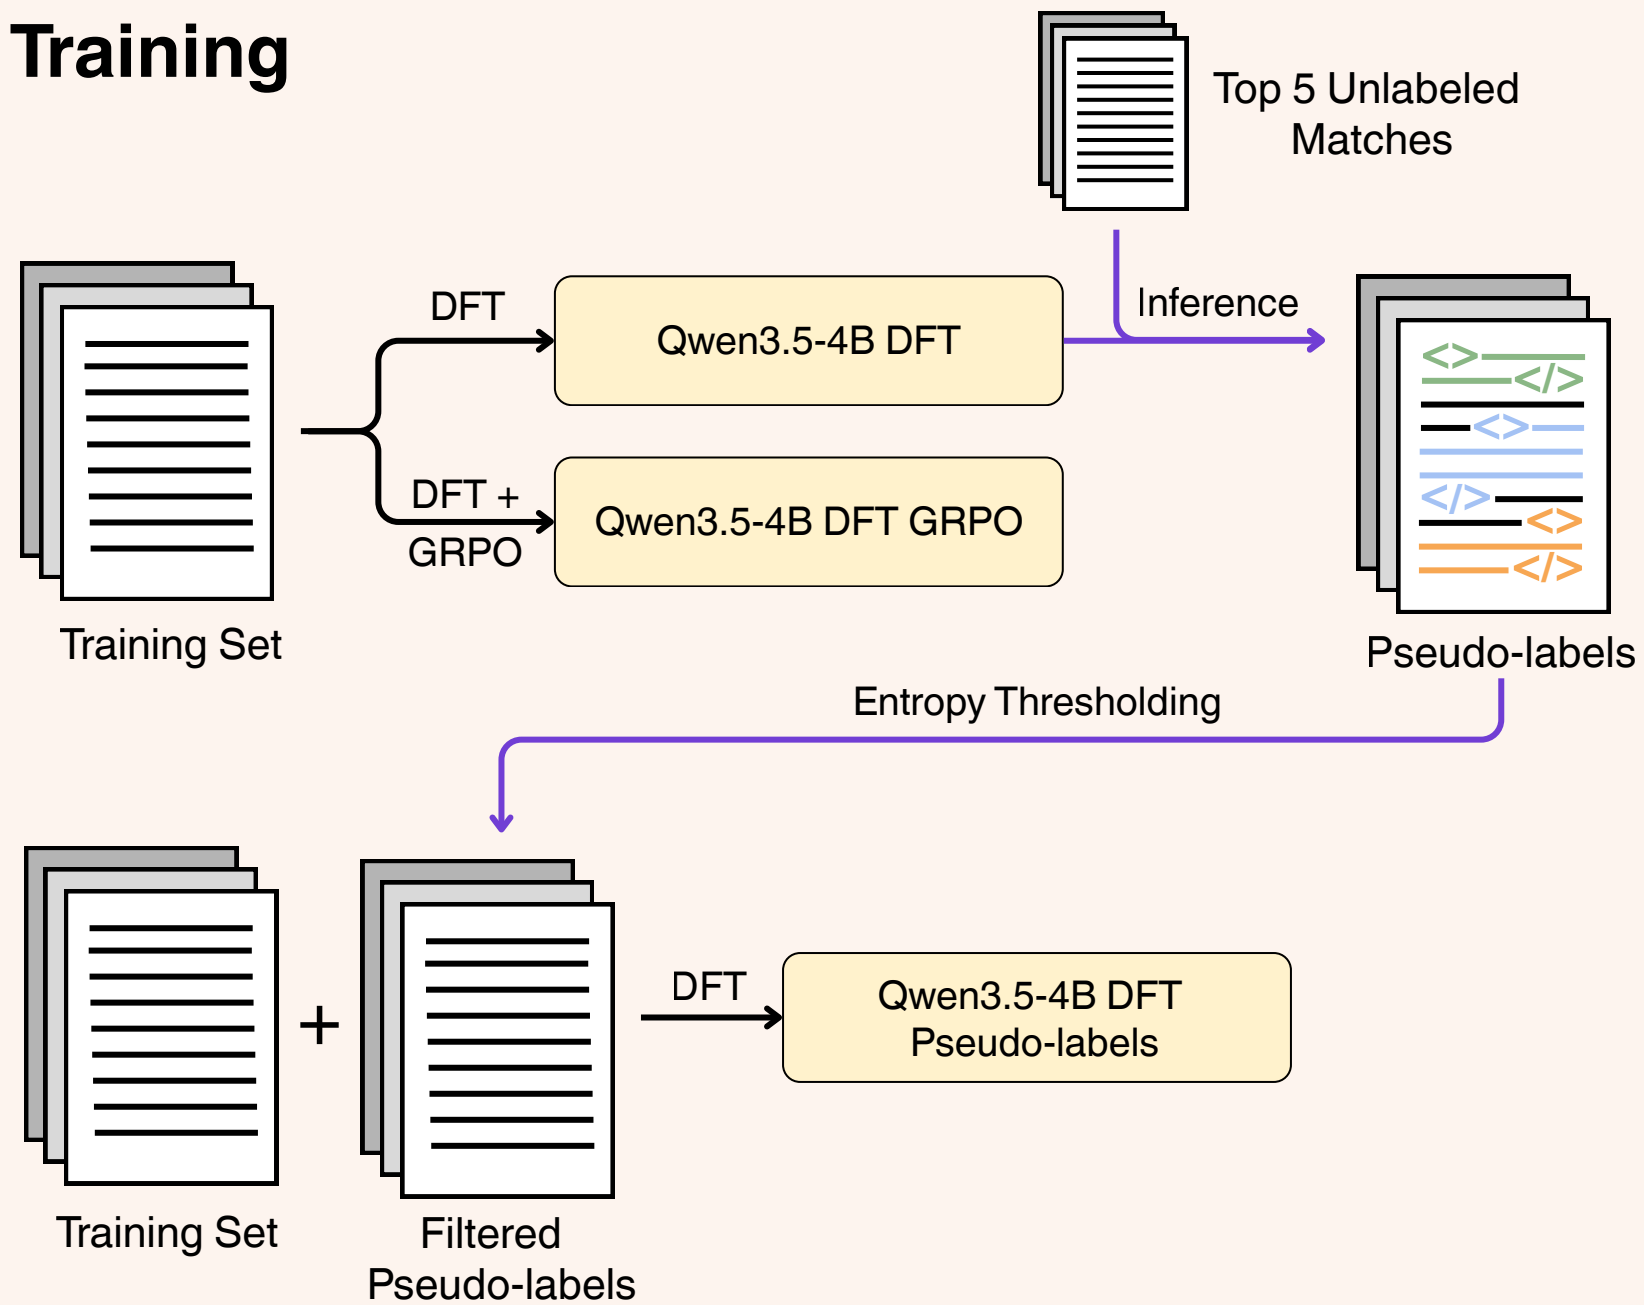

## Testing

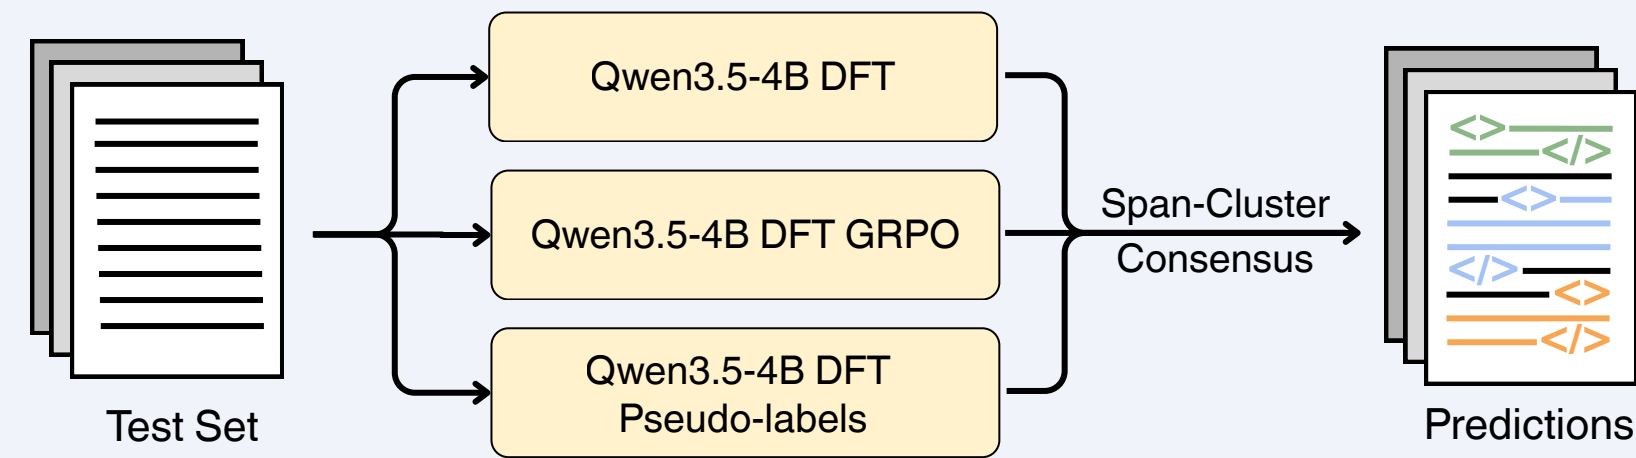

## Pseudo-label Generation

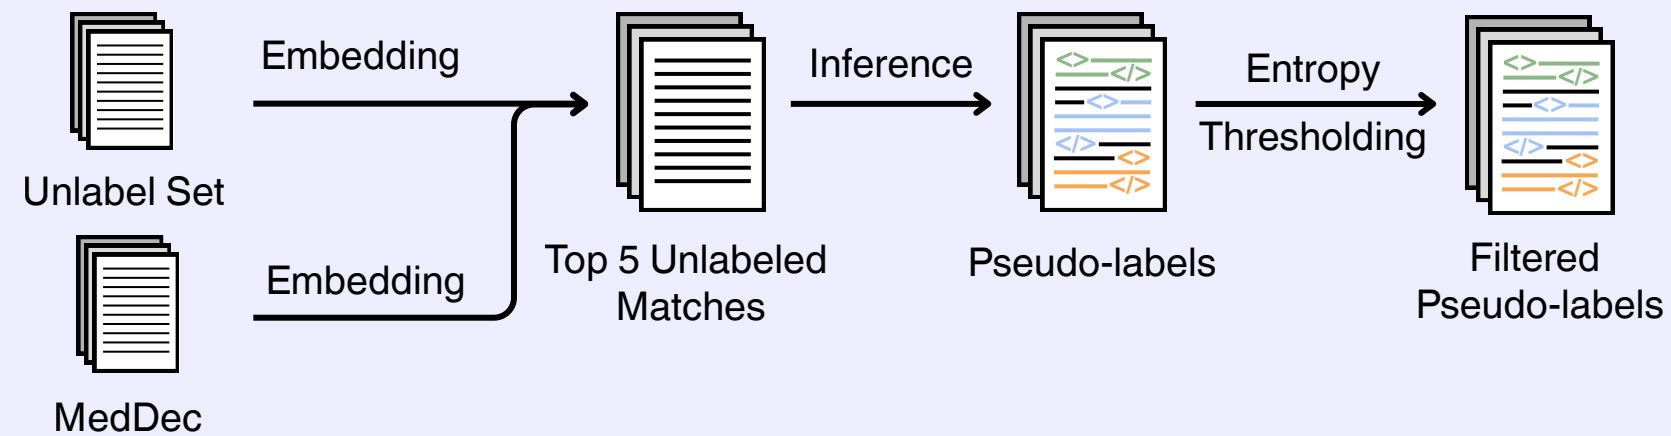

Supplement: SupplementaryMaterial [file overall.pdf › overall.pdf]
